# Supplementary material for: The Male Reproductive Organs in African Swine Fever–Implications for Transmission
Source: Preprints.org preprint supplement (doi:10.20944/preprints202111.0252.v1), 2021-11-15
Supplement: Supplementary file 1 [file supplementary]

## Sheet: Suppl. Table 1
KAB 6/2				SUM 14/11
DPI	OM	CS	Mean	DPI	OM	CS	Mean
1	61	0	0	1	53	0	0
	51	0			60	0
	48	0			58	0
2	61	0	0	2	53	0	0
	51	0			60	0
	48	0			58	0
3	61	0.5	0.5	3	53	0	0
	51	0.5			60	0
	48	0.5			58	0
4	61	1.5	2.16667	4	53	1.5	1.5
	51	2.5			60	1.5
	48	2.5			58	1.5
5	61	3.5	4.66667	5	53	1	1
	51	6.5			60	1
	48	4			58	1
6	61	4.5	5.83333	6	53	1	1.16667
	51	6.5			60	1.5
	48	6.5			58	1
7	61	7.5	14.3333	7	53	4.5	4.5
	51	16.5			60	4.5
	48	19			58	4.5
				8	53	6	6
					58	6
					60	6
DPI	OM	Temperatur	Mean	DPI	OM	Temperatur	Mean
1	61	38.5	38.7	1	53	39	39.0667
	51	38.8			58	39.1
	48	38.8			60	39.1
2	61	38.2	38.6	2	53	39.2	39.0667
	51	38.8			58	39
	48	38.8			60	39
3	61	39.3	39.5667	3	53	38.8	38.7
	51	40.5			58	38.6
	48	38.9			60	38.7
4	61	40	40.2333	4	53	40.4	40.5667
	51	40.8			58	40.2
	48	39.9			60	41.1
5	61	39.7	39.6667	5	53	39.5	39.3667
	51	40.5			58	39.1
	48	38.8			60	39.5
6	61	39.3	40.1667	6	53	41	40.3
	51	40.8			58	40.5
	48	40.4			60	39.4
7	61	39.9	40.2	7	53	39.6	40.4333
	51	41.1			58	40.8
	48	39.6			60	40.9

## Sheet: Suppl. Table 2
ASFV "Germany 2020"
DPI	#	CS
1	10	0
	11	0
	13	0
	14	0
	15	0
	17	0
	18	0
	19	0
2	10	0
	11	0
	13	0
	14	0
	15	0
	17	0
	18	0
	19	0
3	10	0
	11	0
	13	0
	14	0
	15	0
	17	0
	18	0
	19	0
4	10	1.5
	11	1.5
	13	2.5
	14	1.5
	15	2.5
	17	1.5
	18	1.5
	19	1.5
5	10	2.5
	11	2.5
	13	3.5
	14	2.5
	15	2.5
	17	2.5
	18	2.5
	19	2.5
6	10	4
	11	3
	13	5.5
	14	5
	15	4.5
	17	5.5
	18	4.5
	19	4
7	10	5
	11	4
	13	5
	14	6
	15	5
	17	5
	18	5.5
	19	5

## Sheet: Suppl. Table 3
		ASFV "KAB 6/2"												ASFV "SUM 14/11"
		#48			#51			#61						#53			#58			#60
		qPCR		RT-qPCR	qPCR		RT-qPCR	qPCR		RT-qPCR	qPCR		RT-qPCR	qPCR		RT-qPCR	qPCR		RT-qPCR	qPCR		RT-qPCR	qPCR		RT-qPCR
		Cq	gc	Cq	Cq	gc	Cq	Cq	gc	Cq	Mean Cq	Mean gc	Mean Cq	Cq	gc	Cq	Cq	gc	Cq	Cq	gc	Cq	Mean Cq	Mean gc	Mean Cq
EDTA blood	1.	17.9059	82625.3	25.5453	16.146	268799	26.4457	16.1505	267991	27.0757	16.3323	251804	26.268	16.8139	176350	29.88	15.8553	332212	29.32	14.204	989126	27.48	15.645	484668	28.6244
	2.	16.303	241953	25.5112	16.1779	263114	27.1442	16.1129	274830	27.0438				16.8979	166830	29.2	15.8207	339911	29.1	14.2839	938210	26.64
	3.	16.3797	229835	24.7289	15.6975	363086	26.6636	16.1174	273999	26.2536				16.6966	190555	29.62	15.8946	323693	28.82	14.3383	905127	27.56
	Mean	16.8628	184804	25.2618	16.0071	298333	26.7512	16.127	272273	26.791				16.8028	177911	29.5667	15.8569	331939	29.08	14.2754	944154	27.2267
Spleen	1.	21.1347	9488.17	45	19.6494	25678.1	31.0486	19.1684	35446.2	31.7109	19.892	34902.2	34.194	21.2481	9419.57	30.44	18.8382	46295.4	29.17	19.1397	37933.2	28.23	19.6756	30698.8	30.3789
	2.	22.3677	4151.7	45	17.1677	135518	30.8606	19.2953	32556.4	30.3262				20.3848	16662.7	30.74	19.0367	40604.5	32.32	18.935	43427.3	31.32
	3.	21.571	7082.16	33.0423	19.5857	26797.7	30.8153	19.0883	37401.7	29.9418				21.0113	11014.9	31.5	19.3214	33643	29.67	19.1656	37289.1	30.02
	Mean	21.6911	6907.34	41.0141	18.8009	62664.5	30.9082	19.184	35134.7	30.6596				20.8814	12365.7	30.8933	19.0654	40180.9	30.3867	19.0801	39549.8	29.8567
Testis	1.	19.5353	27719.3	45	16.4341	221597	31.0767	16.0835	280311	30.95	17.0339	190516	35.6676	17.69	98852	31.76	16.3449	240400	30.55	17.2117	135589	29.3	17.4207	138476	29.6467
	2.	18.3294	62205.9	45	16.706	184680	31.5594	15.939	308811	30.85				19.1245	38315.4	29.82	17.336	124895	29	15.973	307369	29.65
	3.	18.0862	73218	45	16.077	281538	30.782	16.1143	274569	30.79				17.9437	83596.8	29.98	17.2596	131364	27.52	17.9025	85904.7	29.24
	Mean	18.6503	54381	45	16.4057	229271	31.1394	16.0456	287897	30.8633				18.2527	73588.1	30.52	16.9802	165553	29.0233	17.0291	176287	29.3967
Epididymis	1.	19.7124	24615.4	33.5461	19.1037	37018.2	31.2861	18.5377	54099.2	35.28	19.1937	37092.3	35.0077	21.5171	7885.91	31.76	18.1314	73845.1	30.99	17.3309	125319	30.82	19.2277	62654.7	31.0444
	2.	19.3185	32053.4	45	18.3912	59679.1	31.2238	20.0618	19476.8	31.41				21.6161	7386.82	32.01	18.4565	59575	31.03	17.4171	118384	29.43
	3.	19.6198	26193.1	45	18.7317	47500.4	31.1536	19.2663	33194.8	31.17				22.5643	3948.1	31.76	18.4632	59311.7	30.84	17.5527	108237	30.76
	Mean	19.5502	27620.6	41.182	18.7422	48065.9	31.2212	19.2886	35590.2	32.62				21.8992	6406.94	31.8433	18.3503	64243.9	30.9533	17.4336	117313	30.3367
Epididymal sperm	1.	27.0148	184.248	31.9007	26.6439	236.26	30.5094	26.167	325.246	30.87	25.4821	599.743	30.7826	22.9865	2987.06	31.2	27.634	138.585	45	24.7656	922.04	45	24.6886	2148.08	35.8367
	2.	25.6175	470.102	31.6146	24.8943	763.342	30.5186	24.866	777.937	30.28				21.7957	6560.17	31.13	27.1242	194.082	34.21	24.7023	961.405	29.48
	3.	24.2972	1139.03	31.244	24.9185	751.044	29.9255	24.9196	750.48	30.18				21.842	6362.8	30.97	26.5974	274.883	45	24.7499	931.652	30.54
	Mean	25.6432	597.794	31.5865	25.4856	583.548	30.3179	25.3176	617.888	30.4433				22.208	5303.34	31.1	27.1185	202.517	41.4033	24.7393	938.365	35.0067
Prostate gland	1.	26.7783	215.898	45	27.2501	157.362	45	27.1239	171.258	45	27.0205	208.599	45	28.1517	98.4355	45	28.259	91.6988	45	27.0047	210.027	45	27.5667	191.468	45
	2.	27.1047	173.481	45	27.3886	143.418	45	26.9924	187.044	45				28.368	85.3278	45	28.2476	92.3952	45	26.2419	347.658	45
	3.	26.2049	317.083	45	28.6619	61.0839	45	25.6801	450.767	45				28.3755	84.9108	45	28.0561	104.859	45	25.3961	607.9	45
	Mean	26.696	235.487	45	27.7669	120.621	45	26.5988	269.69	45				28.2984	89.558	45	28.1876	96.3176	45	26.2142	388.528	45
Vesicular gland	1.	29.3839	37.6472	45	29.3408	38.7516	45	28.0653	91.1157	45	28.8692	56.3439	45	30.3501	23.0339	45	28.1145	100.887	45	27.6273	139.203	45	28.6336	107.539	45
	2.	28.3425	75.6677	45	28.2013	83.1786	45	29.0623	46.7046	45				30.7044	18.2272	45	29.0321	55.0231	45	26.8255	236.426	45
	3.	28.9817	49.2992	45	29.4329	36.4323	45	29.0123	48.2981	45				29.5137	40.0278	45	29.0786	53.3572	45	26.4567	301.665	45
	Mean	28.9027	54.2047	45	28.9916	52.7875	45	28.7133	62.0395	45				30.1894	27.0963	45	28.7418	69.7558	45	26.9698	225.765	45
Bulourethral gland	1.	28.176	84.6033	45	29.4716	35.4996	45	26.6141	241.024	45	28.4705	102.29	45	27.8272	121.975	45	26.2838	338.165	45	25.0263	776.138	45	26.7269	350.84	45
	2.	27.2574	156.598	45	28.0616	91.3461	45	29.2356	41.5832	45				28.3791	84.708	45	26.6091	272.77	45	25.1618	709.71	45
	3.	27.6571	119.796	45	32.3906	5.01717	45	27.3707	145.147	45				29.1982	49.3061	45	26.1837	361.282	45	25.8733	443.509	45
	Mean	27.6968	120.332	45	29.9746	43.9543	45	27.7401	142.585	45				28.4681	85.3298	45	26.3589	324.073	45	25.3538	643.119	45

## Sheet: Suppl. Table 4
	ASFV "Germany 2020"
	#10			#11			#13			#14			#15			#17			#18			#19			Mean
	qPCR		RT-qPCR	qPCR		RT-qPCR	qPCR		RT-qPCR	qPCR		RT-qPCR	qPCR		RT-qPCR	qPCR		RT-qPCR	qPCR		RT-qPCR	qPCR		RT-qPCR	qPCR		RT-qPCR
	Cq	gc	Cq	Cq	gc	Cq	Cq	gc	Cq	Cq	gc	Cq	Cq	gc	Cq	Cq	gc	Cq	Cq	gc	Cq	Cq	gc	Cq	Mean Cq	Mean gc	Mean Cq
EDTA Blood	14.43	442300000	33.16	15.15	283000000	28.93	16.41	130000000	29.43	16.46	126500000	28.52	15.6	214700000	27.38	15.5	227800000	28.93	15.72	199800000	27.95	15.42	239200000	27.41	15.5862	232912500	28.9637
Spleen	18.1	45890000	27.54	18.4	38200000	34.94	18	48790000	32.71	18.38	38790000	32.5	19.59	18310000	35.53	18.29	40960000	32.66	20.7	9267000	32.43	18.96	27090000	32.59	18.8025	33412125	32.6125
Testis	17.12	60163.9	35.06	17.49	46605.7	34.66	17.07	62051.3	32.13	19.16	14863.9	32.23	17.36	50967.9	30.33	18.5	23272.5	33.71	17.88	35676.2	34.01	17.58	43751	31.52	17.77	42169	32.9562
Epididymis	23.86	589.345	34.45	23.22	910.583	37.43	25.53	186.638	45	23.97	311.355	35.17	22.21	1828.06	45	25.27	223.224	37.57	25.86	148.784	45	24.94	279.234	33.82	24.3575	559.653	39.18
Prostate gland	26.48	97.3879	45	25.17	238.955	35.7	27.29	55.8911	45	27.91	36.4868	45	25.96	138.543	45	28.63	22.1432	45	29.11	15.9921	45	29.18	15.184	45	27.4663	77.5729	43.8375
Vesicular gland	27.13	62.3573	36.97	25.99	135.674	45	27.64	43.9198	29.47	28.98	17.512	32.23	26.82	76.9326	45	27.8819	37.107	45	26.86	75.0646	45	28.37	26.5054	45	27.459	59.3841	40.4587
Bulbourethral gland	30.65	5.55626	37.66	26.92	71.8565	45	30.19	7.61533	45	31.45	3.20801	45	30.27	7.22265	45	29.81	9.88978	45	30.55	5.94347	45	28.63	22.2549	45	29.8088	16.6934	44.0825
